# Supplementary material for: The Antioxidant Effect of Beta-Alanine or Carnosine Supplementation on Exercise-Induced Oxidative Stress: A Systematic Review and Meta-Analysis
Source: Preprints.org preprint supplement (doi:10.20944/preprints201811.0189.v4), 2018-12-28
Supplement: Supplementary file 1 [file supplementary]

Appendix 1: Search strategy.

**"beta Alanine" [Mesh]** OR "3-Aminopropionic Acid" OR "3 Aminopropionic Acid" OR "beta-Alanine, Monosodium Salt" OR "beta Alanine, Monosodium Salt" OR "beta-Alanine, Monopotassium Salt" OR "beta Alanine, Monopotassium Salt" OR "beta Alanine Hydrochloride" OR "Hydrochloride, beta-Alanine" OR "beta Alanine Hydrochloride" OR "beta-Alanine, Calcium Salt (2:1)" OR carnosine, "(D-His)-Isomer" OR "Carnosine Hydrochloride" OR "Hydrochloride, Carnosine"

**AND "Oxidative Stresses" [Mesh]** OR "Stresses, Oxidative" OR "Stress, Oxidative" OR "Antioxidant Effect" OR "Effect, Antioxidant" OR "Anti-Oxidant Effect" OR "Anti Oxidant Effect" OR "Effect, Anti-Oxidant" OR "Anti-Oxidant Effects" OR "Anti Oxidant Effects" OR "Effects, Anti-Oxidant" OR "Antioxidant Effects" OR "Effects, Antioxidant" OR "Antioxidant Response Element" OR "Element, Antioxidant Response" OR "Elements, Antioxidant Response" OR "Response Element, Antioxidant" OR "Response Elements, Antioxidant" OR "Anti-Oxidant Response Elements" OR "Anti Oxidant Response Elements" OR "Anti-Oxidant Response Element" OR "Element, Anti-Oxidant Response" OR "Elements, Anti-Oxidant Response" OR "Response Element, Anti-Oxidant" OR "Response Elements, Anti-Oxidant" OR "Electrophile Response Elements" OR "Electrophile Response Element" OR "Element, Electrophile Response" OR "Elements, Electrophile Response" OR "Response Element, Electrophile" OR "Response Elements, Electrophile"

**AND Exercise [Mesh]** OR Exercises OR "Physical Activity" OR "Activities, Physical" OR "Activity, Physical" OR "Physical Activities" OR "Exercise, Physical" OR "Exercises, Physical" OR "Physical Exercise" OR "Physical Exercises" OR "Acute Exercise" OR "Acute Exercises" OR "Exercise, Acute" OR "Exercises, Acute" OR "Exercise, Isometric" OR "Exercises, Isometric" OR "Isometric Exercises" OR "Isometric Exercise" OR "Exercise, Aerobic" OR "Aerobic Exercise" OR "Aerobic Exercises" OR "Exercises, Aerobic" OR "Exercise Training" OR "Exercise Trainings" OR "Training, Exercise" OR "Trainings, Exercise",

((("beta Alanine"[Mesh] OR "3-Aminopropionic Acid" OR "3 Aminopropionic Acid" OR "beta-Alanine, Monosodium Salt" OR "beta Alanine, Monosodium Salt" OR "beta-Alanine, Monopotassium Salt" OR "beta Alanine, Monopotassium Salt" OR "beta Alanine Hydrochloride" OR "Hydrochloride, beta-Alanine" OR "beta Alanine Hydrochloride" OR "beta-Alanine, Calcium Salt (2:1)")) OR (l-carnosine OR "L Carnosine" OR **beta alanyl histidine** OR "beta Alanylhistidine" OR carnosine, "(D-His)-Isomer" OR "Carnosine Hydrochloride" OR "Hydrochloride, Carnosine")) AND ("Oxidative Stresses"[Mesh] OR "Stresses, Oxidative" OR "Stress, Oxidative" OR "Antioxidant Effect" OR "Effect, Antioxidant" OR "Anti-Oxidant Effect" OR "Anti Oxidant Effect" OR "Effect, Anti-Oxidant" OR "Anti-Oxidant Effects" OR "Anti Oxidant Effects" OR "Effects, Anti-Oxidant" OR "Antioxidant Effects" OR "Effects, Antioxidant" OR "Antioxidant Response Element" OR "Element, Antioxidant Response" OR "Elements, Antioxidant Response" OR "Response Element, Antioxidant" OR "Response Elements, Antioxidant" OR "Anti-Oxidant Response Elements" OR "Anti Oxidant Response Elements" OR "Anti-Oxidant Response Element" OR "Element, Anti-Oxidant Response" OR "Elements, Anti-Oxidant Response" OR "Response Element, Anti-Oxidant" OR "Response Elements, Anti-Oxidant" OR "Electrophile Response Elements" OR "Electrophile Response Element" OR "Element, Electrophile Response" OR "Elements, Electrophile Response" OR "Response Element, Electrophile" OR "Response Elements, Electrophile")) AND (exercise OR exercises OR "Physical Activity" OR "Activities, Physical" OR "Activity, Physical" OR "Physical Activities" OR "Exercise, Physical" OR "Exercises, Physical" OR "Physical Exercise" OR "Physical Exercises" OR "Acute Exercise" OR "Acute Exercises" OR "Exercise, Acute" OR "Exercises, Acute" OR "Exercise, Isometric" OR "Exercises, Isometric" OR "Isometric Exercises" OR "Isometric Exercise" OR "Exercise, Aerobic" OR "Aerobic Exercise" OR "Aerobic Exercises" OR "Exercises, Aerobic" OR "Exercise Training" OR "Exercise Trainings" OR "Training, Exercise" OR "Trainings, Exercise")

Appendix 2. Risk of bias assessment.

|                                  | Allocation concealment | Blinding of participants and personnel | Blinding of outcome assessment | Incomplete Outcome Data | Selective reporting | Other bias |
|----------------------------------|------------------------|----------------------------------------|--------------------------------|-------------------------|---------------------|------------|
| Belviranli et al. (2016)         | Low                    | Unclear                                | Low                            | Low                     | Low                 | Low        |
| Smith-Ryan et al. (2013)         | Low                    | High                                   | Low                            | Low                     | Low                 | High       |
| Smith-Ryan et al. (2012)         | Low                    | High                                   | Low                            | Low                     | Low                 | High       |
| Slowinska-Lisowska et al. (2014) | Low                    | Low                                    | Low                            | Low                     | Low                 | Low        |
